# Supplementary material
Source: MDPI journal article supplement (https://www.mdpi.com/2673-4591/19/1/45)
Supplement: s1 [file s1 › engproc-1814119-supplementary.pdf]

## NEW HPLC METHOD FOR SURFACTANTS DETECTION IN WASTEWATERS SAMPLES

*Paun Iuliana<sup>1,2</sup>, Florentina Laura Chiriac<sup>1</sup>, Florinela Pirvu<sup>1,2</sup>, Vasile Ion Iancu<sup>1</sup>, Cristina Ileana Covaliu<sup>2</sup>,*<sup>1</sup>National Research and Development Institute for Industrial Ecology – ECOIND, 57-73 Drumul Podu Dambovitei Street, RO-060652, Bucharest, Romania.<sup>2</sup>University POLITEHNICA of Bucharest, Faculty of Biotechnical Systems Engineering, 313 Splaiul Independentei Blvd., RO-060042, Bucharest, Romania**1. Introduction.**

Benzalkonium chlorides (alkylbenzyltrimethylammonium), widely used as cationic surfactants, are mixtures of alkyl homologues of dodecyl-(C12), tetradecyl- (C14) and hexadecyl- (C16) benzyl trimethylammonium chlorides. Benzyl trimethyl dodecyl ammonium chloride (BAC-12), benzyl trimethyl tetradecyl ammonium chloride (C14-BAC) and benzyl trimethyl hexadecyl ammonium chloride C16-BAC) are applied as bactericides and disinfectants in sanitary products and antistatic agents in the formula of laundry conditioners. After use, residual amounts of benzalkonium chloride and their degradation products are discharged into wastewater treatment plants or directly into surface water and groundwater. Benzalkonium chlorides belong to the category of emerging pollutants.

**2. Materials and methods**

The aim of this work was the development and validation of a new High Performance Liquid Chromatography (HPLC) combined with diode array detector method for simultaneous analysis of benzyl trimethyl dodecyl ammonium chloride (C12-BAC), benzyl trimethyl tetradecyl ammonium chloride (C14-BAC) and benzyl trimethyl hexadecyl ammonium chloride C16-BAC) in wastewater samples. Chemical structures of these surfactants are shown in Fig.1

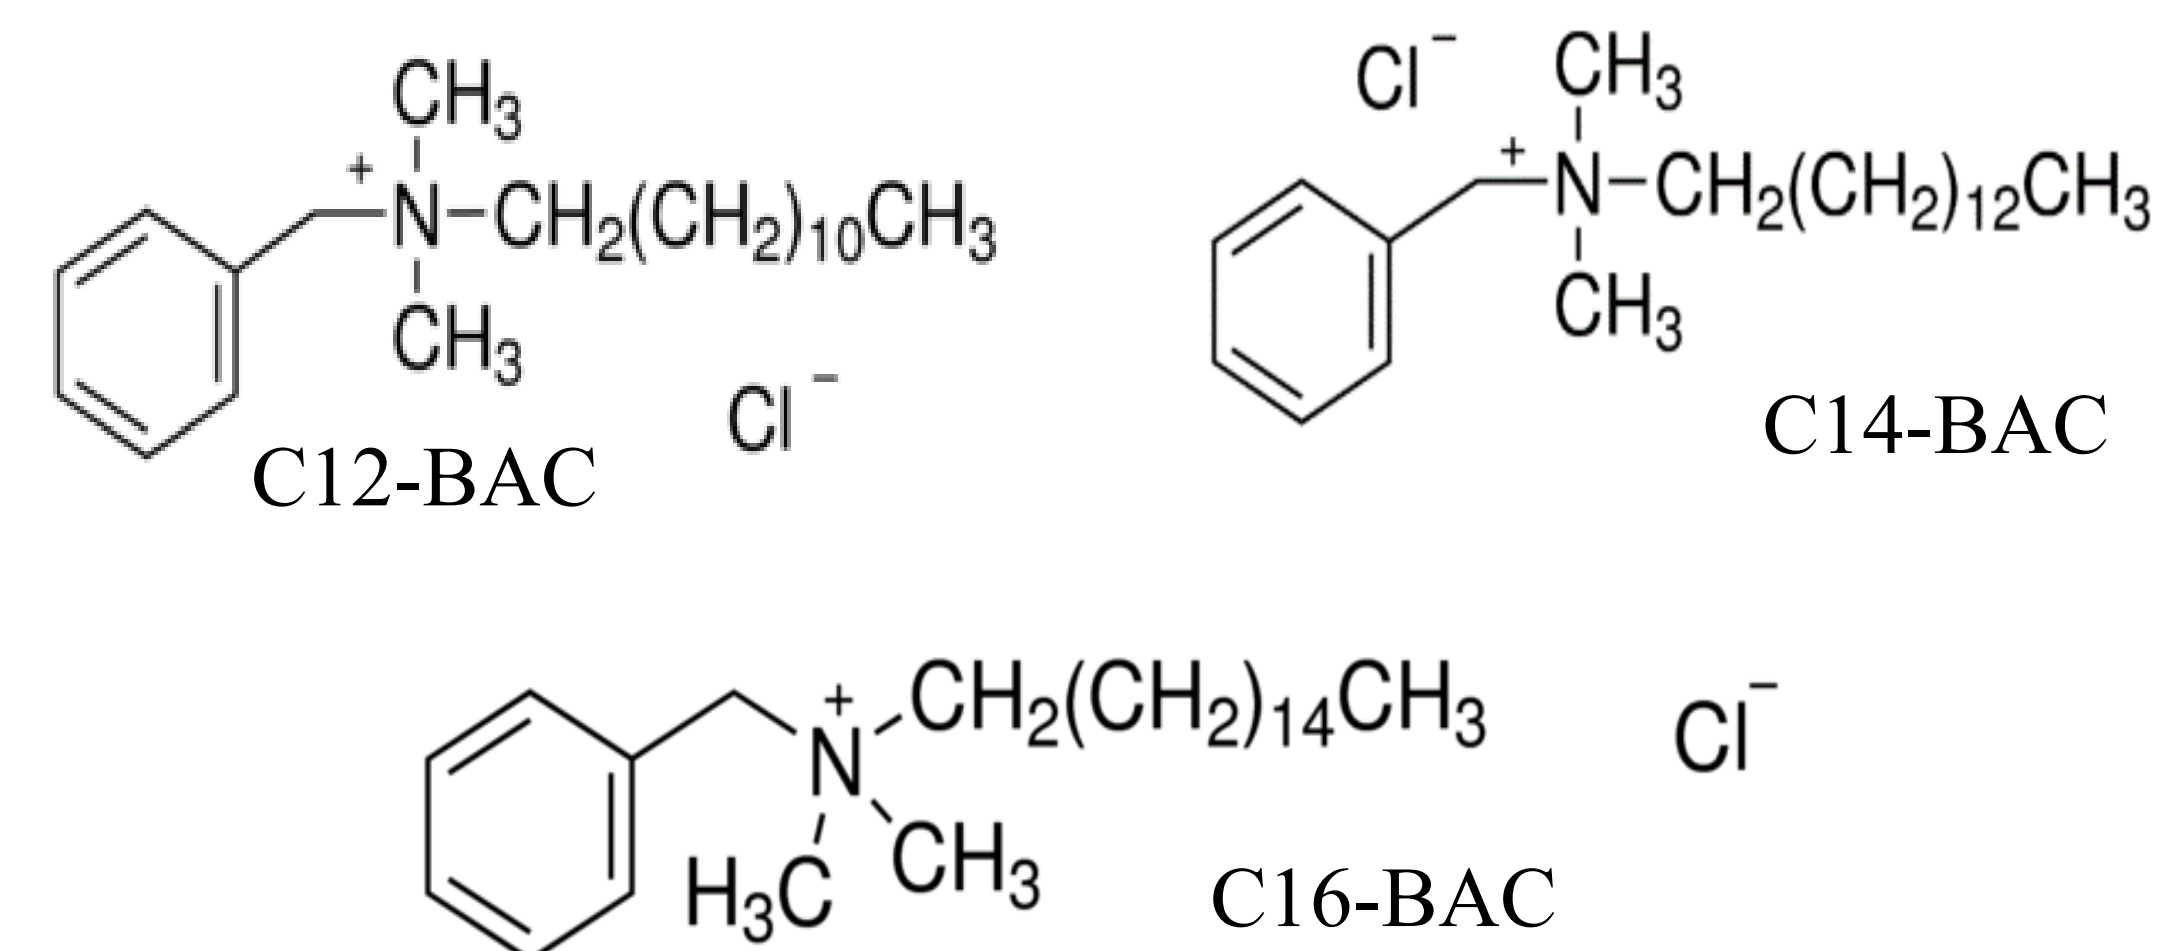

Fig.1 Chemical structures of cationic surfactants

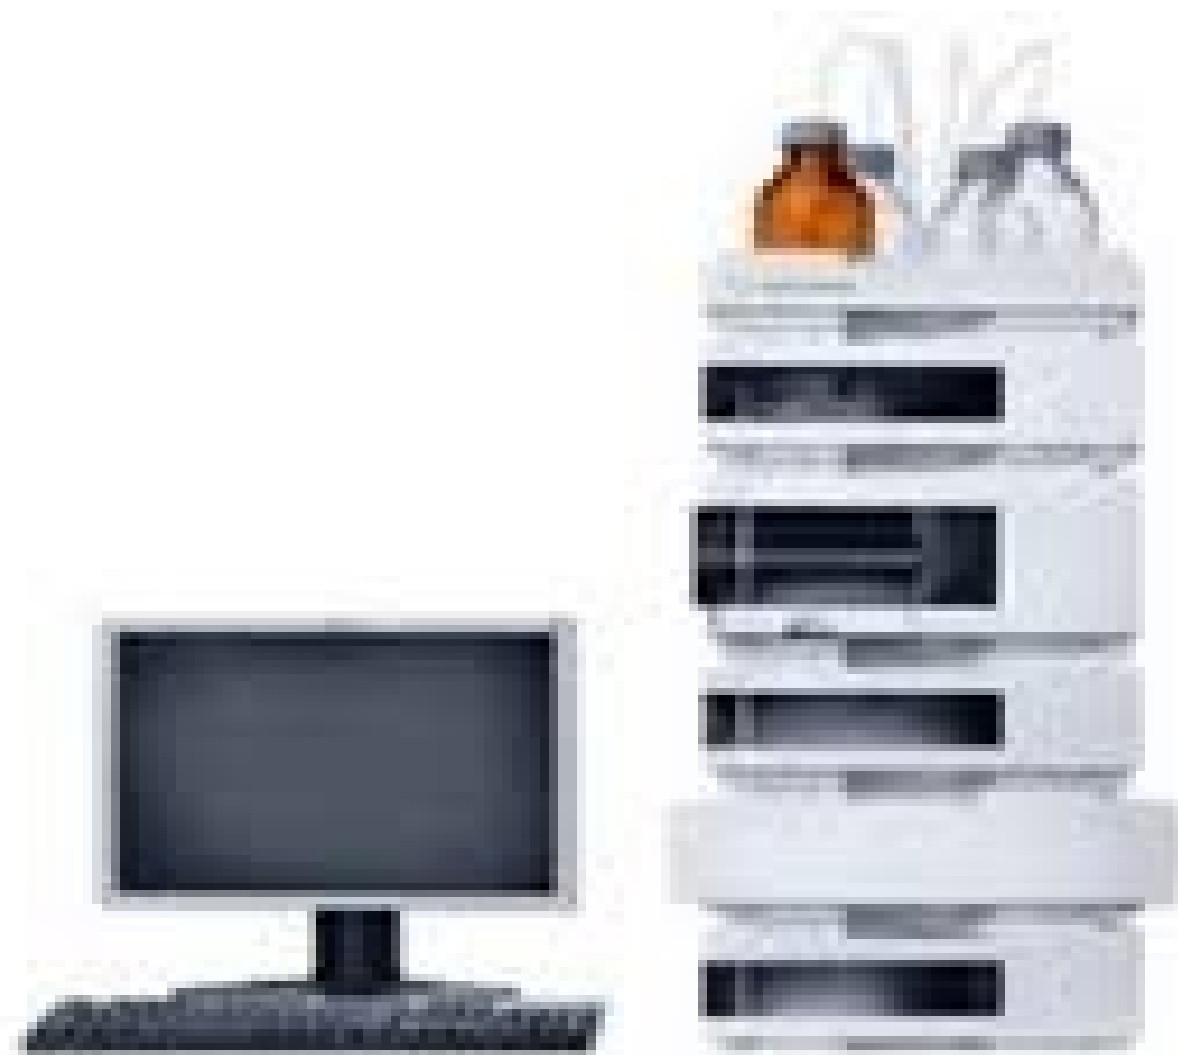**Equipment:**

All analytical determinations were performed using an Agilent 1200 HPLC chromatograph (DIONEX) and UV-VIS diode array detector connected in tandem with Charged Aerosol Detector (Corona Veo RS).

**HPLC/DAD parameters:**

Column: Acclaim Surfactant Plus (3.0 x 150 mm, 3 $\mu$ m), temperature: 30 $^{\circ}$ C, Injection volume : 20  $\mu$ L, UV –VIS detection:  $\lambda$  = 262 nm for the three cationic surfactants

Mobile phase: mixture of acetonitrile (A) and 0,2 M ammonium acetate solution (B) (50:50, v/v) . Flow-rate: 0.5 mL/min

Instrument control / data processing: Agilent Chem Station

**Solid phase extraction procedure:** Off-line solid phase extraction(SPE) was performed by passing 100 ml sample through a Strata-X (500 mg/6 ml) cartridge from Phenomenex. The SPE protocol is presented in Table 1.

Table 1. Description of SPE protocol for wastewater samples extraction

| Step                                                                                                                              | Eluents                                                                                   |
|-----------------------------------------------------------------------------------------------------------------------------------|-------------------------------------------------------------------------------------------|
| Conditioning                                                                                                                      | 5 ml acetonitrile and 10 ml water                                                         |
| Load sample                                                                                                                       | 100 ml sample at constant flow rate of 2 ml/ min                                          |
| Wash                                                                                                                              | 20 ml water with 10% (v/v) acetic acid, dry 10 min                                        |
| Elution                                                                                                                           | 8.5 ml acetonitrile –water with 10% acid acetic (90/10, v/v) at constant flow of 1 ml/min |
| The extraction phase was evaporate and reconstitute in 1mL ammonium acetate 0.2M, transferred to a autosampler vial and analysed. |                                                                                           |

**3. Results and Discussion**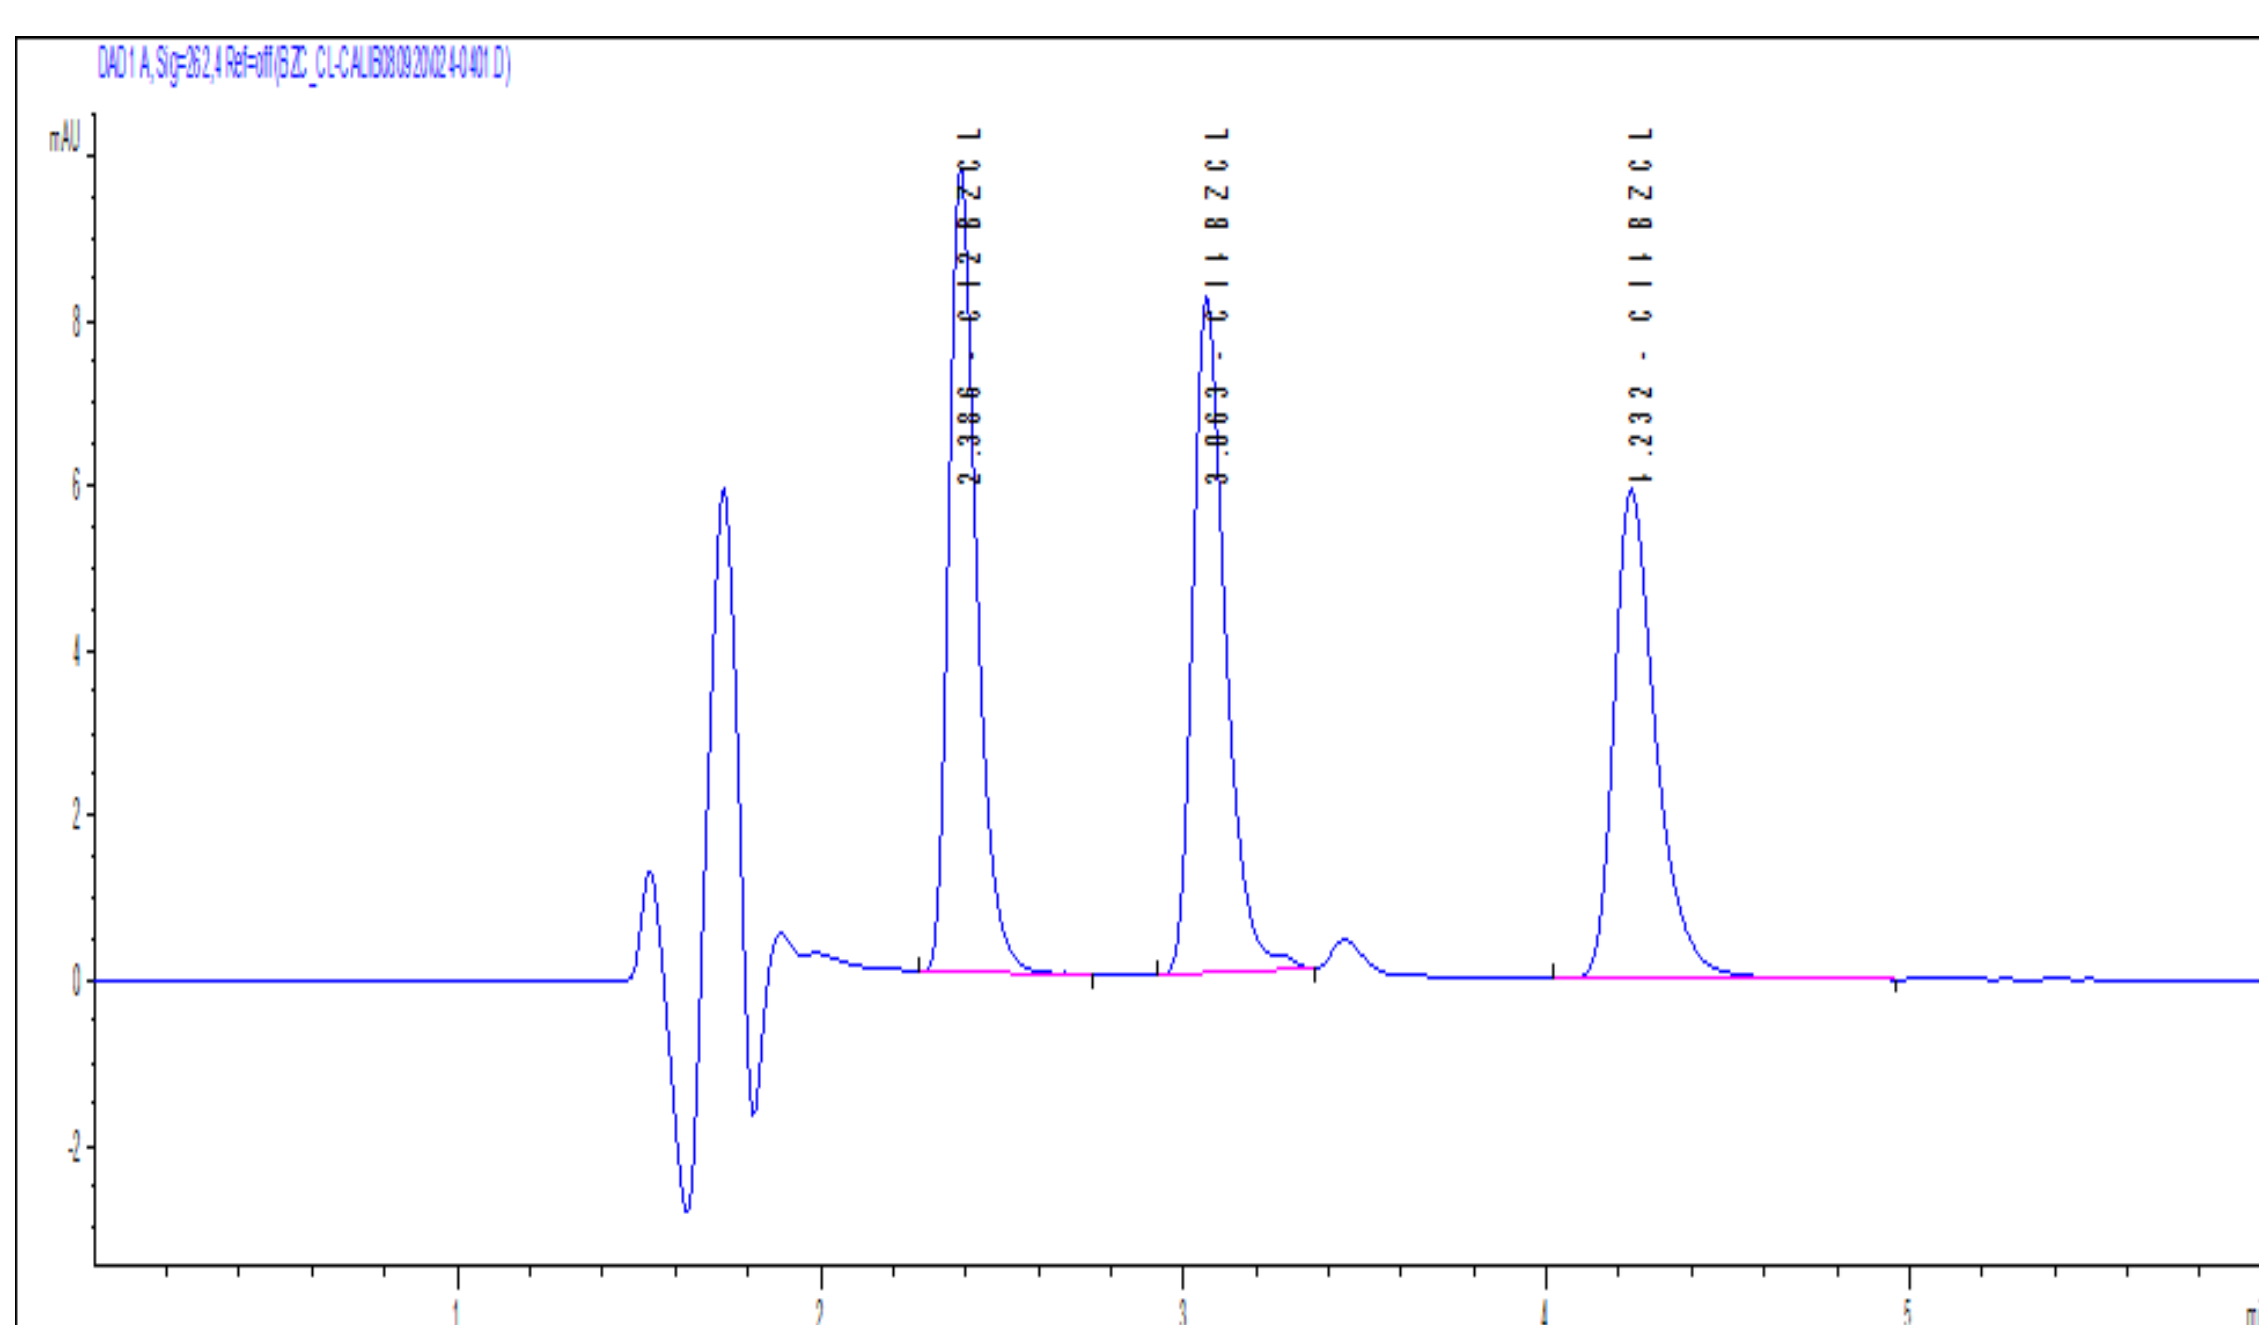

Fig. 2. Chromatogram of 50 mg/L cationic surfactants standard solution and their corresponding retention times

Table 2. The validation parameters for the proposed method: correlation coefficients ( $R^2$ ), intra-day and inter-day precision, analyte recovery, detection limits (DLs) and quantitation limit (QLs)

| Surfactant | Concentration range (mg/L) | $R^2$  | Precision (RSD%) |           | Analyte recovery (%) | DLs ( $\mu$ g/L) | QLs ( $\mu$ g/L) |
|------------|----------------------------|--------|------------------|-----------|----------------------|------------------|------------------|
|            |                            |        | Intra-day        | Inter-day |                      |                  |                  |
| BAC-12     | 1 - 100                    | 0.9992 | 1.37             | 6.14      | 93.5                 | 1.50             | 4.5              |
| BAC-14     | 1 - 100                    | 0.9996 | 2.27             | 6.49      | 90.29                | 1.87             | 5.6              |
| BAC-16     | 1 - 100                    | 0.9997 | 2.20             | 6.65      | 86.0                 | 2.53             | 7.6              |

**4. Conclusions**

The new sensitive and selective HPLC/DAD developed method allows simultaneous determination of cationic surfactants mixture from wastewaters. Low limits of detection obtained for all surfactants (4.5  $\mu$ g/l to 7.6 $\mu$ g/l) and acceptable recovery values (>90%) show that the method is sensitive and precise. The optimized method was tested from domestic wastewater from office buildings, hospital, car wash, as well as from gas stations, obtaining concentration values varying from few  $\mu$ g/L to few mg/L.

**Acknowledgments:** The authors acknowledge the financial support offered by The Romanian National Research Program “Nucleu” through contract no. 20N/2019, Project code PN 19 04 01 01
